# Supplementary material
Source: PubMed Central journal article supplement (PMC9329377)

## Supplementary information

**Journal name: Scientific Reports**

**Research article: A ricin-based peptide BRIP from *Hordeum vulgare* inhibits M<sup>pro</sup> of SARS-CoV-2**

### Author names

Prakriti Kashyap<sup>1#</sup>, Vijay Kumar Bhardwaj<sup>1,2,3#</sup>, Mahima Chauhan<sup>1,2</sup>, Varun Chauhan<sup>4</sup>, Asheesh Kumar<sup>1,2</sup>, Rituraj Purohit<sup>1,2,3\*\*</sup>, Arun Kumar<sup>1,2\*</sup>, Sanjay Kumar<sup>1\*\*</sup>

### Affiliations:

<sup>1</sup>Biotechnology Division, CSIR-Institute of Himalayan Bioresource Technology, Palampur, Himachal Pradesh, 176061, India

<sup>2</sup>Academy of Scientific and Innovative Research, Ghaziabad, 201002, Uttar Pradesh, India

<sup>3</sup>Structural Bioinformatics Lab, CSIR-Institute of Himalayan Bioresource Technology, Palampur, Himachal Pradesh, 176061, India

<sup>4</sup>Covid-19 Testing Facility, Dietetics & Nutrition Technology Division, Council of Scientific and Industrial Research-Institute of Himalayan Bioresource Technology (CSIR-IHBT), Palampur (H.P), India, 176061

#Equal contribution

Corresponding author\*:

Dr. Arun Kumar: [arunkumar@ihbt.res.in](mailto:arunkumar@ihbt.res.in)

Co-corresponding authors\*\*:

Dr. Rituraj Purohit: [rituraj@ihbt.res.in](mailto:rituraj@ihbt.res.in)

Dr. Sanjay Kumar: [sanjaykumar@ihbt.res.in](mailto:sanjaykumar@ihbt.res.in)

**Supplementary Table S1:** Physicochemical properties of peptides.

| Peptide     | Molecular weight | Theoretical pI | Formula                                                                         | Extinction coefficients (M-1 cm-1, at 280 nm measured in water) | Estimated half-life (mammalian reticulocytes, in vitro) | Instability index | Aliphatic index | Grand average of hydrophobicity (GRAVY) | Allergenicity scores (Threshold= -0.4) |
|-------------|------------------|----------------|---------------------------------------------------------------------------------|-----------------------------------------------------------------|---------------------------------------------------------|-------------------|-----------------|-----------------------------------------|----------------------------------------|
| <b>PAP</b>  | 2026.34          | 6.14           | C <sub>90</sub> H <sub>144</sub> N <sub>24</sub> O <sub>27</sub> S <sub>1</sub> | 0.735                                                           | 20 hours                                                | 28.88             | 91.76           | -0.135                                  | 0.17                                   |
| <b>SAP</b>  | 2052.42          | 8.75           | C <sub>92</sub> H <sub>150</sub> N <sub>26</sub> O <sub>25</sub> S <sub>1</sub> | 0.726                                                           | 20 hours                                                | 3.28              | 114.71          | 0.265                                   | 0.037                                  |
| <b>TRI</b>  | 2012.25          | 6.14           | C <sub>89</sub> H <sub>142</sub> N <sub>24</sub> O <sub>29</sub>                | 0.740                                                           | 20 hours                                                | 90.66             | 80.59           | -0.565                                  | -0.17                                  |
| <b>BRIP</b> | 1912.23          | 6.00           | C <sub>86</sub> H <sub>138</sub> N <sub>22</sub> O <sub>25</sub> S <sub>1</sub> | -                                                               | 5.5 hours                                               | 9.41              | 102.94          | 0.700                                   | -0.57                                  |

**Supplementary Table S2:** The interacting residues of M<sup>pro</sup> protein belonging to five predicted binding sites with BRIP peptide.

| M <sup>pro</sup> -BRIP Complex | H-bonds           | Non bonded contacts                                                                                     |
|--------------------------------|-------------------|---------------------------------------------------------------------------------------------------------|
| <b>Binding Site 1</b>          | His41 and Gln19   | Thr29, Thr26, Met49, Ser46, Thr26, Asn119, Asn142, Cys146, Gln169, Gln69, and Thr21                     |
| <b>Binding Site 2</b>          | Gln189            | His164, Glu166, Met165, His41, Asn142, Cys44, Thr45, Ser46, Pro168, Met49, Thr24, and Thr25             |
| <b>Binding Site 3</b>          | Thr25             | Gly143, Asn142, Phe140, Leu141, His172, Ser139, Gly138, Glu166, Cys145, Thr45, Ser46, Thr26, and Leu167 |
| <b>Binding Site 4</b>          | Tyr237 and Ala285 | Tyr239, Thr199, Leu272, Asn238, Asn236, Met276, Leu286, and Gly278                                      |
| <b>Binding Site 5</b>          | Asp245            | Ile249, Gln244, Thr243, Gln107, Gln110, and Asp248                                                      |

**Supplementary Fig. S1: Ramachandran plot results of refined BRIP model.**

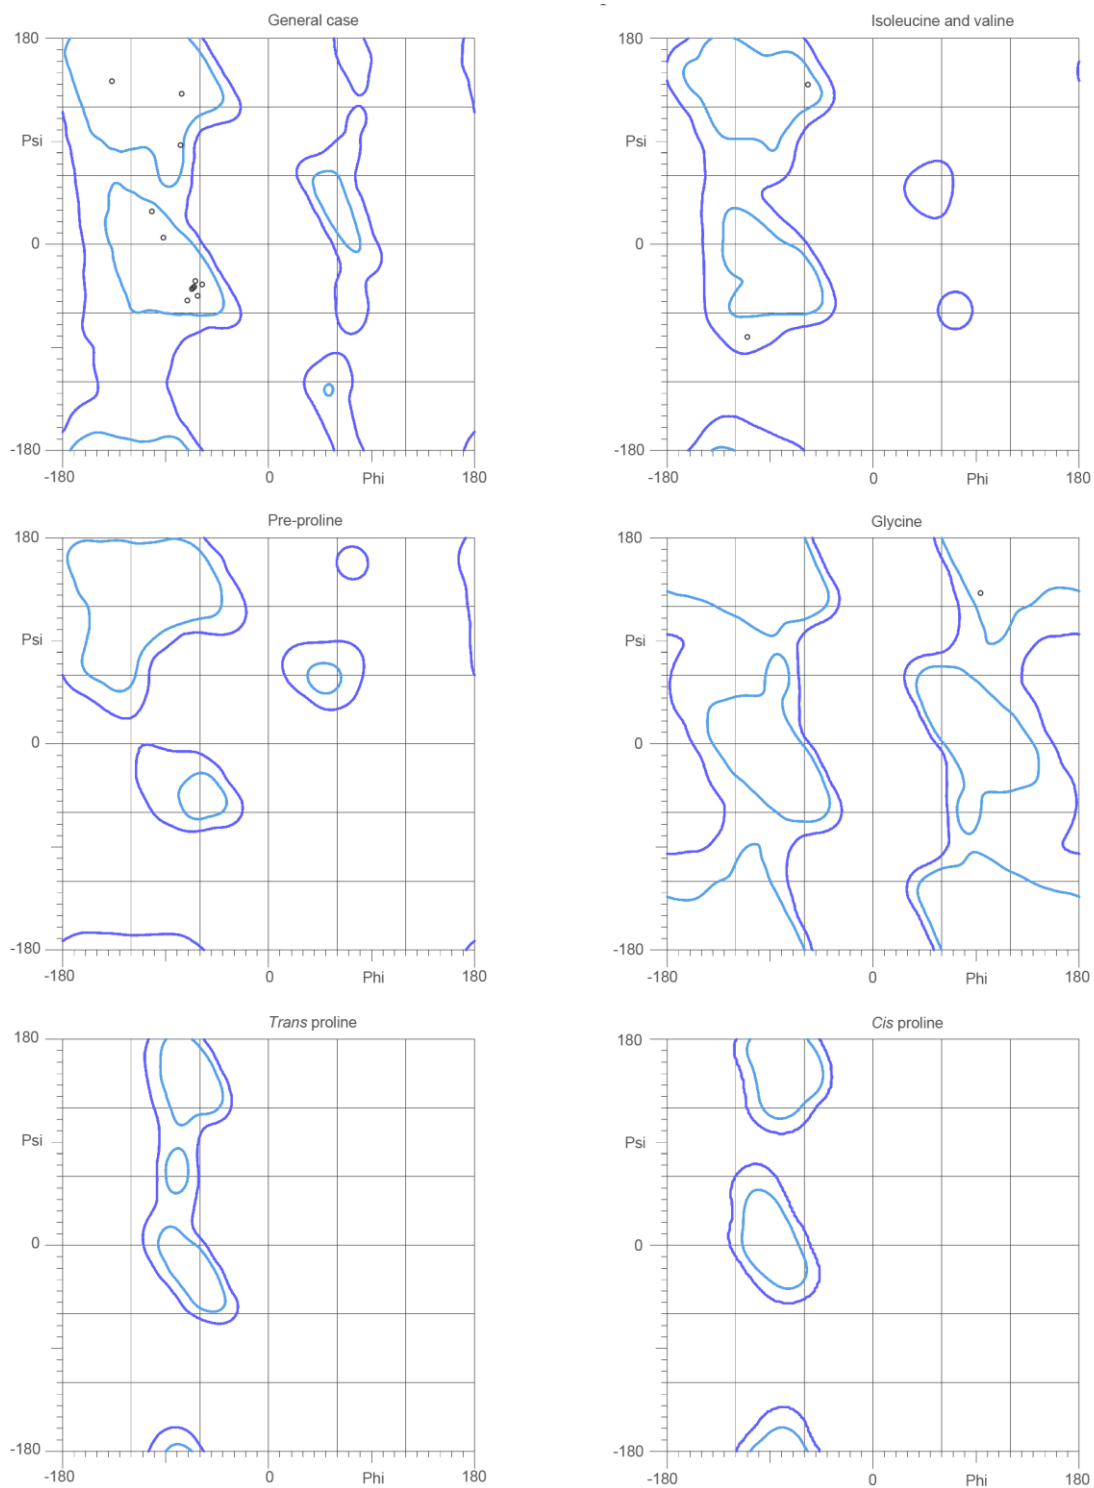

93.3% (14/15) of residues were in favoured (98%) region.

100.0% (15/15) of all residues were in allowed (>99.8%) regions.

There were no outliers.

**Supplementary Fig. S2:** The relationship between pull force and distance moved by the BRIP peptide during steered MD simulations.

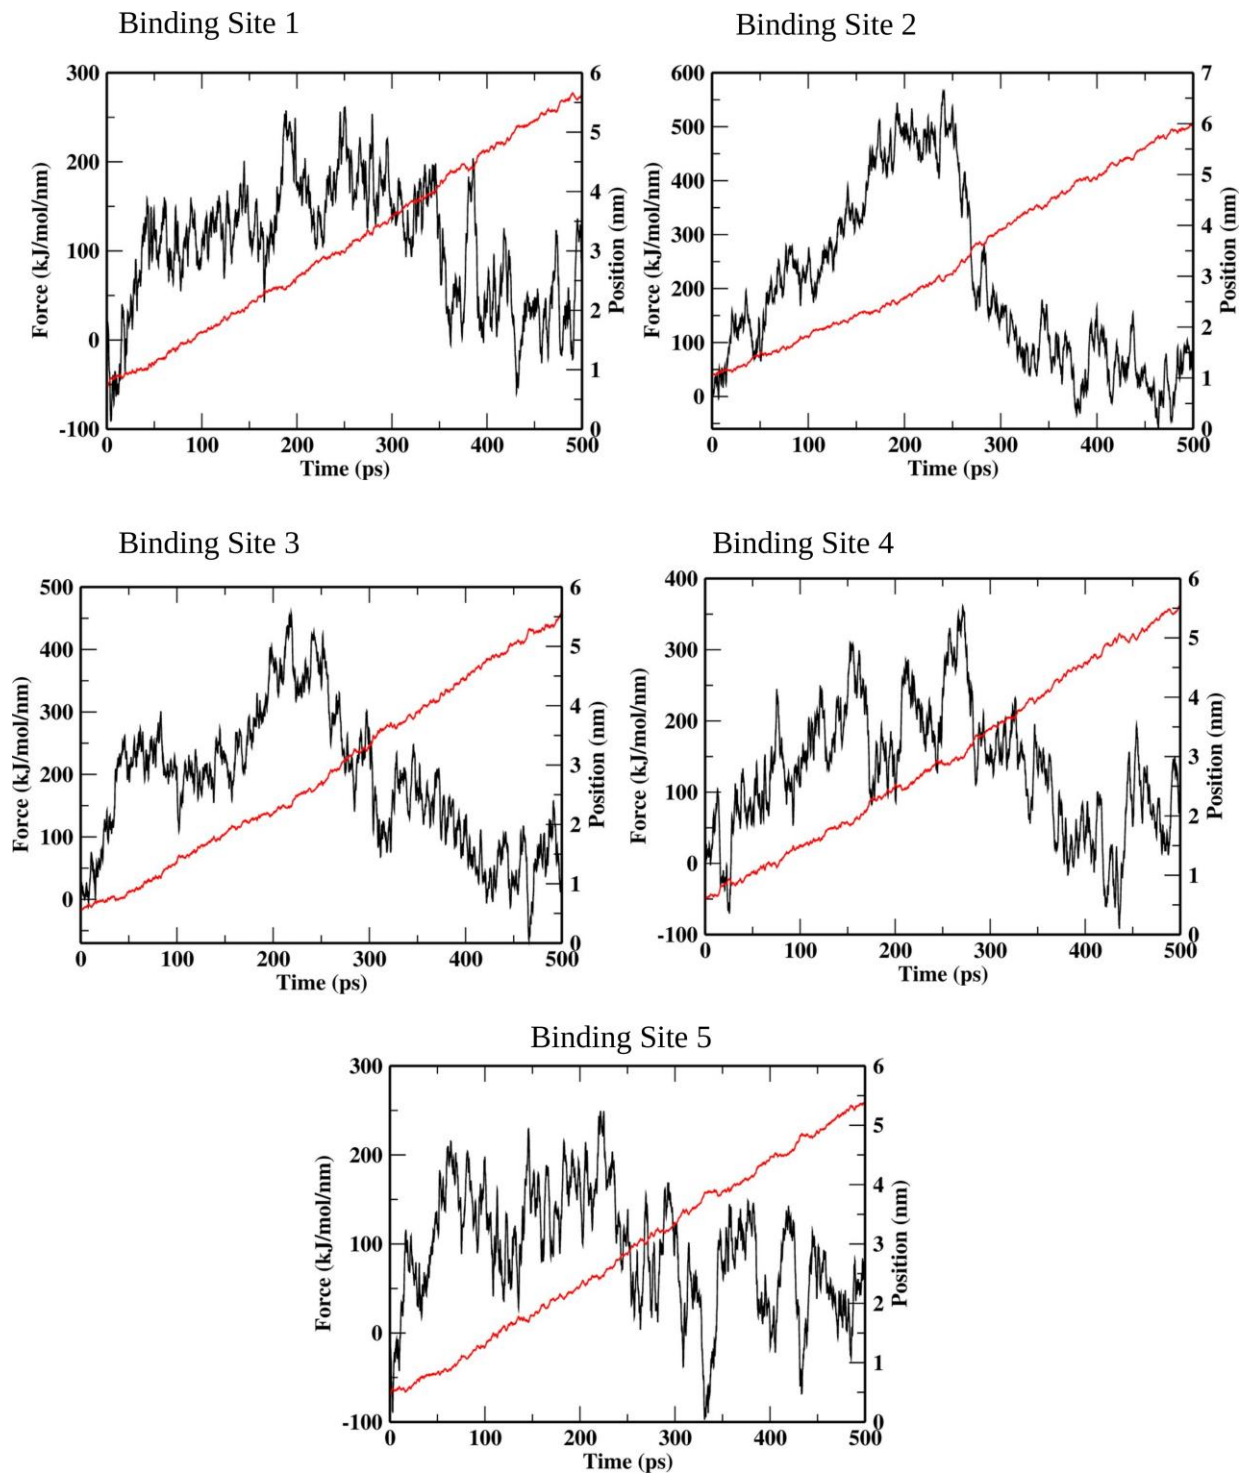

**Supplementary Fig. S3: Analysis of structural parameters of M<sup>pro</sup>-BRIP complex.** (a) RMSDs for M<sup>pro</sup>-BRIP complex. The green line represents the running average. (b) RMSF of backbone C- $\alpha$  atoms (c) Rg of M<sup>pro</sup>-BRIP complex and (d) SASA of M<sup>pro</sup>-BRIP complex.

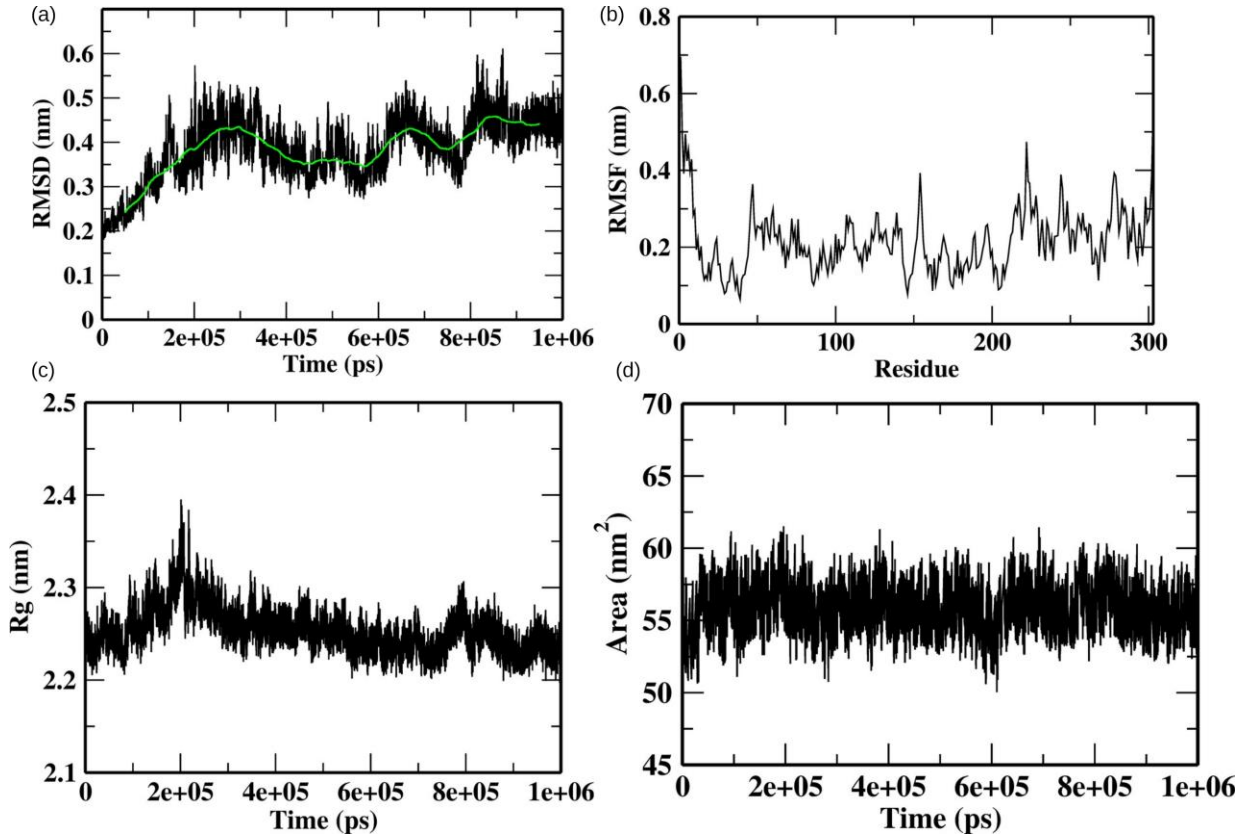

**Supplementary Fig. S4:** Graphical representation of the Delta\_E\_Binding free energy for M<sup>pro</sup>-BRIP complex.

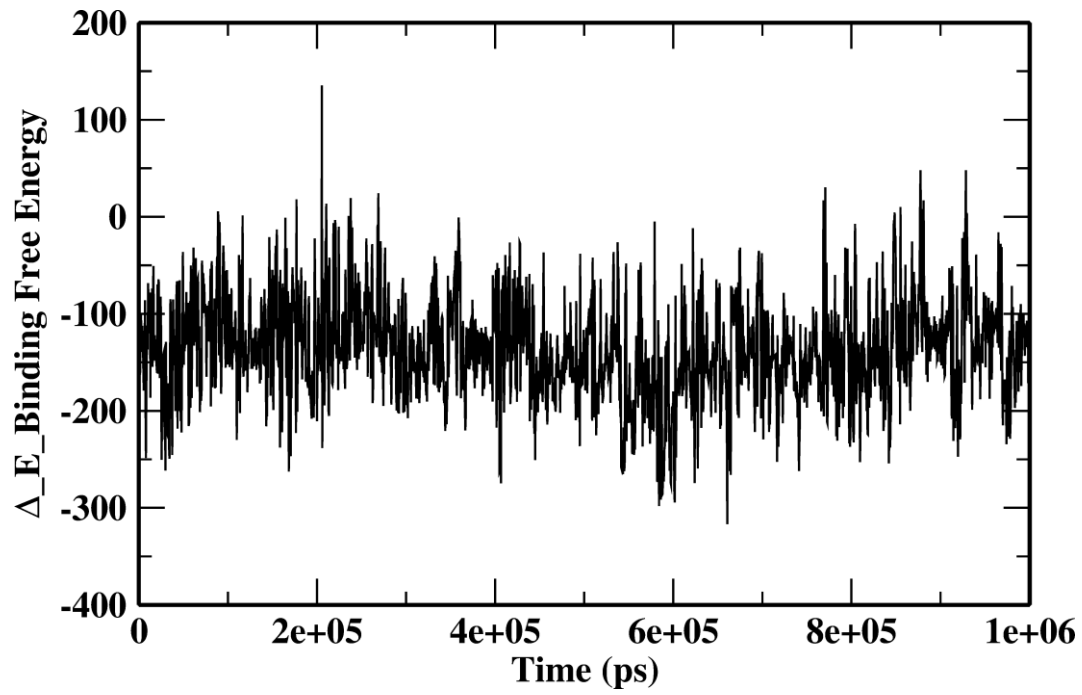

Supplement: 41598_2022_15977_MOESM1_ESM.pdf [file 41598_2022_15977_MOESM1_ESM.pdf]
